# Supplementary material for: Cesarean Section, Formula Feeding, and Infant Antibiotic Exposure: Separate and Combined Impacts on Gut Microbial Changes in Later Infancy
Source: PubMed Central journal article supplement (PMC5622971; doi:10.3389/fped.2017.00200), 2017-09-26
Supplement: table_1.pdf [file table_1.pdf]

Table S1: Increases and decreases to microbial (OTU) abundance within perinatal exposure groups from 3 months to 1 year of infant age at the phylum level

| Phyla             | Vaginal Breastfed & No Antibiotic use (infants=71 pairs, total 1124) |            |             | Vaginal Breastfed & Antibiotic use (infants=34 pairs, Total 1111) |             |             | Vaginal Not Breastfed & Antibiotic use (infants=8 pairs, Total 995) |           |             | Vaginal Not Breastfed & No Antibiotic use (infants=17 pairs, Total 1094) |             |             | Elective CS Breastfed & Antibiotic-use (infants=13 pairs, Total 1069) |           |             | Elective CS Not Breastfed & Antibiotic-use (infants=3 pairs, Total 918) |          |             | Emergency CS Breastfed Antibiotic-use (infants=16 pairs, total 1067) |           |             |
|-------------------|----------------------------------------------------------------------|------------|-------------|-------------------------------------------------------------------|-------------|-------------|---------------------------------------------------------------------|-----------|-------------|--------------------------------------------------------------------------|-------------|-------------|-----------------------------------------------------------------------|-----------|-------------|-------------------------------------------------------------------------|----------|-------------|----------------------------------------------------------------------|-----------|-------------|
|                   | ↑                                                                    | ↓          | ↔           | ↑                                                                 | ↓           | ↔           | ↑                                                                   | ↓         | ↔           | ↑                                                                        | ↓           | ↔           | ↑                                                                     | ↓         | ↔           | ↑                                                                       | ↓        | ↔           | ↑                                                                    | ↓         | ↔           |
| p__Actinobacteria | 1.5% (17)                                                            | 0.3% (3)   | 1.6% (13)   | 1.8% (20)                                                         | 0.4% (4)    | 0.8% (9)    | 1.8% (18)                                                           | 0.3% (3)  | 1.0% (10)   | 0.6% (7)                                                                 | 0.3% (3)    | 2.1% (23)   | 1.6% (17)                                                             | 0.1% (1)  | 1.4% (15)   | 0                                                                       | 0        | 3.2% (29)   | 1.9% (20)                                                            | 0.2% (2)  | 1.0% (11)   |
| p__Bacteroidetes  | 10.9% (123)                                                          | 3.2% (36)  | 8.4% (94)   | 11.5% (128)                                                       | 3.7% (41)   | 7.5% (83)   | 11.1% (110)                                                         | 2.2% (22) | 9.2% (92)   | 2.7% (29)                                                                | 4.0% (44)   | 15.9% (174) | 12.0% (128)                                                           | 1.3% (14) | 8.6% (92)   | 0                                                                       | 0.1% (1) | 22.2% (204) | 11.8% (126)                                                          | 1.7% (18) | 9.3% (99)   |
| p__Cyanobacteria  | 0.3% (3)                                                             | 0          | 0.2% (2)    | 0.4% (4)                                                          | 0           | 0.1% (1)    | 0.4% (4)                                                            | 0         | 0.1% (1)    | 0.1% (1)                                                                 | 0           | 0.4% (4)    | 0.3% (3)                                                              | 0         | 0.1% (1)    | 0                                                                       | 0        | 0.2% (2)    | 0.2% (2)                                                             | 0         | 0.2% (2)    |
| p__Firmicutes     | 27.9% (313)                                                          | 9.1% (102) | 20.4% (229) | 28.4% (316)                                                       | 10.4% (115) | 18.0% (200) | 26.0% (259)                                                         | 5.5% (55) | 24.5% (244) | 7.0% (77)                                                                | 11.7% (128) | 38.4% (421) | 28.3% (302)                                                           | 4.7% (50) | 24.6% (263) | 0.1% (1)                                                                | 0.2% (2) | 55.2% (507) | 28.4% (303)                                                          | 3.8% (41) | 24.1% (257) |
| p__Fusobacteria   | 0.4% (4)                                                             | 0          | 0.3% (3)    | 0.4% (4)                                                          | 0           | 0.3% (3)    | 0.2% (2)                                                            | 0         | 0.3% (3)    | 0                                                                        | 0           | 0.6% (6)    | 0.2% (2)                                                              | 0         | 0.4% (4)    | 0                                                                       | 0        | 0.4% (4)    | 0.2% (2)                                                             | 0         | 0.3% (3)    |
| p__Proteobacteria | 6.6% (74)                                                            | 2.9% (32)  | 6.1% (68)   | 7.4% (82)                                                         | 3.3% (37)   | 5.0% (55)   | 7.3% (73)                                                           | 2.1% (21) | 7.0% (70)   | 1.6% (18)                                                                | 3.7% (40)   | 10.2% (111) | 7.5% (80)                                                             | 1.6% (17) | 6.7% (97)   | 0                                                                       | 0.1% (1) | 17.2% (158) | 7.1% (76)                                                            | 0.9% (10) | 8.1% (86)   |
| p__TM7            | 0                                                                    | 0          | 0.1% (1)    | 0                                                                 | 0.1% (1)    | 0           | 0                                                                   | 0         | 0.1% (1)    | 0                                                                        | 0.1% (1)    | 0           | 0                                                                     | 0         | 0.1% (1)    | 0                                                                       | 0        | 0.1% (1)    | 0                                                                    | 0         | 0.1% (1)    |
| p__Tenericutes    | 0                                                                    | 0.1% (1)   | 0.1% (1)    | 0                                                                 | 0.1% (1)    | 0           | 0                                                                   | 0         | 0           | 0                                                                        | 0.1% (1)    | 0           | 0                                                                     | 0         | 0           | 0                                                                       | 0        | 0.1% (1)    | 0                                                                    | 0         | 0.1% (1)    |
| p__Verrucomicrobi | 0.1% (1)                                                             | 0.2% (2)   | 0.4% (4)    | 0.2% (2)                                                          | 0.2% (2)    | 0.3% (3)    | 0.2% (2)                                                            | 0.2% (2)  | 0.3% (4)    | 0                                                                        | 0.3% (3)    | 0.4% (4)    | 0.2% (2)                                                              | 0.1% (1)  | 0.4% (4)    | 0                                                                       | 0.1% (1) | 0.7% (6)    | 0.1% (1)                                                             | 0.1% (1)  | 0.5% (5)    |
